# Supplementary material for: Temporal trends in renal function and birthweight in Japanese adolescent males (1998–2015)
Source: PubMed Central journal article supplement — Nephrol Dial Transplant. 2017 Jan 17;33(2):304–10. doi: 10.1093/ndt/gfw428 (PMC5837670; doi:10.1093/ndt/gfw428), 2017-01-17
Supplement: gfw428_ndt-01045-2016.pdf [file gfw428_ndt-01045-2016.pdf]

**Supplement Table 1. Demographic, anthropometric, and laboratory characteristics by birth weight category**

| Birth weight                     | <2500            | 2500-2999        | 3000-3999        | ≥4000            | Trend test |
|----------------------------------|------------------|------------------|------------------|------------------|------------|
|                                  | n=146            | n=1067           | n=2462           | n=62             | p value    |
|                                  | Mean ± SD        | Mean ± SD        | Mean ± SD        | Mean ± SD        |            |
| Height (cm)                      | 167.8 ± 5.2      | 169.2 ± 5.4      | 171.4 ± 5.5      | 174.7 ± 6.6      | <0.01      |
| Weight (kg)                      | 57.8 ± 7.7       | 59.1 ± 8.0       | 61.3 ± 8.6       | 65.6 ± 8.6       | <0.01      |
| BMI (kg/m <sup>2</sup> )         | 20.5 ± 2.2       | 20.6 ± 2.6       | 20.8 ± 2.6       | 21.5 ± 2.3       | <0.01      |
| SBP (mm Hg)                      | 114.6 ± 11.1     | 116.0 ± 13.5     | 114.9 ± 12.9     | 113.7 ± 14.0     | 0.52       |
| DBP (mm Hg)                      | 62.0 ± 8.5       | 63.9 ± 9.8       | 63.5 ± 9.1       | 62.5 ± 8.5       | 0.80       |
| Mean BP(mm Hg)                   | 79.6 ± 8.4       | 81.3 ± 10.1      | 80.6 ± 9.5       | 79.6 ± 9.8       | 0.90       |
| Creatinine (mg/dL)               | 0.79 ± 0.11      | 0.79 ± 0.11      | 0.79 ± 0.10      | 0.78 ± 0.09      | 0.39       |
| eGFR (mL/min)                    | 96.2 ± 14.1      | 98.5 ± 14.7      | 101.5 ± 14.9     | 107.6 ± 17.2     | <0.01      |
| Total cholesterol (mg/dL)        | 167.3 ± 29.1     | 168.2 ± 26.7     | 168.0 ± 27.3     | 168.0 ± 25.4     | 0.89       |
| Triglyceride (mg/dL)*            | 57.5 (42.3-77.8) | 54.0 (40.0-75.0) | 52.0 (38.0-73.0) | 47.5 (38.5-74.8) | 0.36       |
| High density lipoprotein (mg/dL) | 63.3 ± 12.9      | 63.5 ± 12.4      | 64.1 ± 12.9      | 63.9 ± 13.4      | 0.69       |
| Uric acid (mg/dL)                | 6.0 ± 1.1        | 6.1 ± 1.2        | 5.9 ± 1.1        | 5.7 ± 1.1        | 0.04       |
| Glucose (mg/dL)                  | 86.6 ± 7.3       | 86.6 ± 7.8       | 86.3 ± 8.2       | 86.4 ± 7.6       | 0.79       |
| Gestational age (weeks)          | 37.0 ± 2.0       | 38.7 ± 1.5       | 39.4 ± 1.3       | 40.1 ± 0.9       | <0.01      |

Note. BMI, body mass index; SBP, systolic blood pressure; DBP, diastolic blood pressure; eGFR, estimated glomerular filtration rate. Values are expressed as mean ± SD.

\* TG value are expressed as median(IQR).

Trend test : a trend test with a linear contrast between birth weight category.

## Supplement Table 2. Simple and multiple linear regression analyses of factors associated with eGFR

|                            | simple liner regression analysis |                 |         |         | multiple liner regression analysis |                |         |
|----------------------------|----------------------------------|-----------------|---------|---------|------------------------------------|----------------|---------|
|                            | Coeff                            | 95%CI           | p value | R2      | Coeff                              | 95%CI          | p value |
| Current weight (1kg)       | 0.05                             | -0.01 to 0.10   | 0.10    | 0.00073 | 0.12                               | 0.06 to 0.18   | <0.01   |
| Birth weight (1kg)         | 5.24                             | 4.01 to 6.48    | <0.01   | 0.018   | 3.45                               | 2.16 to 4.74   | <0.01   |
| Total cholesterol (1mg/dL) | -0.04                            | -0.06 to -0.02  | <0.01   | 0.0045  | -0.05                              | -0.06 to -0.03 | <0.01   |
| Triglyceride (1mg/dL)      | -0.02                            | -0.03 to -0.005 | <0.01   | 0.0020  |                                    |                |         |
| HDL (1mg/dL)               | 0.03                             | -0.005 to 0.07  | 0.09    | 0.00076 | 0.06                               | 0.02 to 0.10   | <0.01   |
| Glucose (1mg/dL)           | 0.12                             | 0.06 to 0.19    | <0.01   | 0.0043  | 0.11                               | 0.04 to 0.17   | <0.01   |
| Uric acid (1mg/dL)         | -2.15                            | -2.57 to -1.73  | <0.01   | 0.027   | -2.13                              | -2.57 to -1.70 | <0.01   |
| Mean BP (1mmHg)            | -0.03                            | -0.08 to 0.02   | 0.24    | 0.00037 |                                    |                |         |

Abbreviations: CI, confidence interval; Coeff,  $\beta$  coefficient; HDL, high-density lipoprotein; BP, blood pressure.

Multiple linear regression analysis was adjusted for age, year, BW, and metabolic parameters. The results are the final selected model.
